# Supplementary material for: Cross Talk between MarR-Like Transcription Factors Coordinates the Regulation of Motility in Uropathogenic Escherichia coli
Source: PubMed Central journal article supplement (PMC6246914; doi:10.1128/iai.00338-18), 2018-11-20
Supplement: zii999092608s1.pdf [file zii999092608s1.pdf]

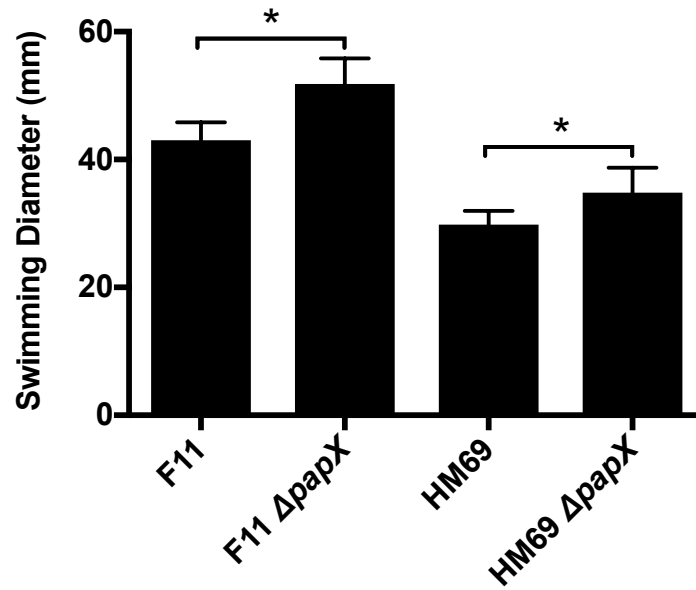

**Fig. S1. The loss of *papX* in the cystitis UPEC isolates F11 and HM69 increases motility.**

Bars represent the average diameter (mm) of swimming motility of bacteria following a 16-18 hr incubation at 30°C (N=6). The error bars represent the standard deviation, and a Student's *t*-test was used for statistical analysis. \*,  $P < 0.05$

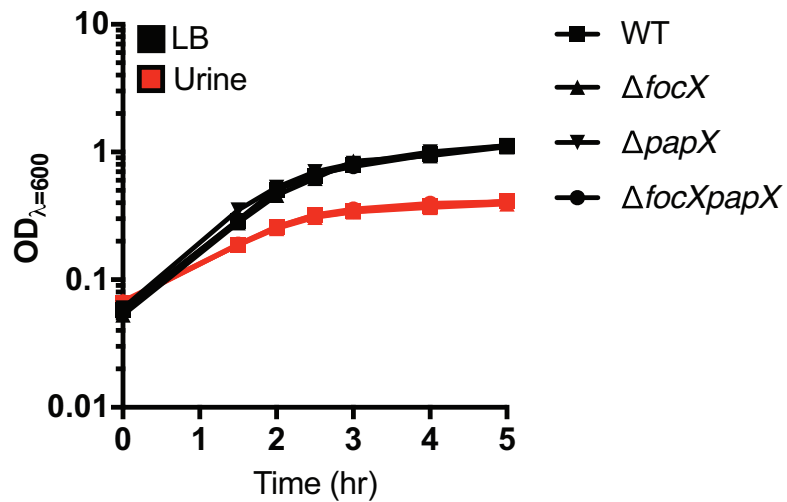

**Fig. S2. Growth curves showing similar levels of bacterial growth between CFT073 wild type and the  $\Delta focX$ ,  $\Delta papX$ ,  $\Delta focXpapX$  constructs.** Bacteria were diluted 1:100 from overnight cultures into either fresh pooled, sterilized human urine (red) or LB medium (black) and cultured with aeration at 37°C for 5 hrs. Data represent the OD<sub>600</sub> measurements taken at different time points.

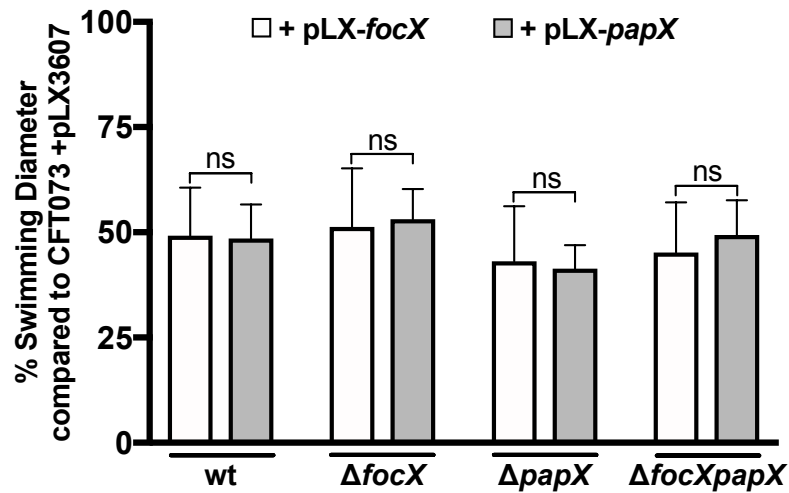

**Fig. S3. Expression of either *focX* or *papX* represses motility.** Bars represent the average diameter (mm) of swimming motility of CFT073, carrying either pLX-*focX* or pLX-*papX*, compared to CFT073 carrying an empty vector control following 16-18 hr incubation at 30°C. Data represent five biological replicates with the error bars showing the standard deviation. Tukey's multiple comparisons test following ANOVA was used for statistical analysis. \*,  $P < 0.05$ ; ns (not significant).

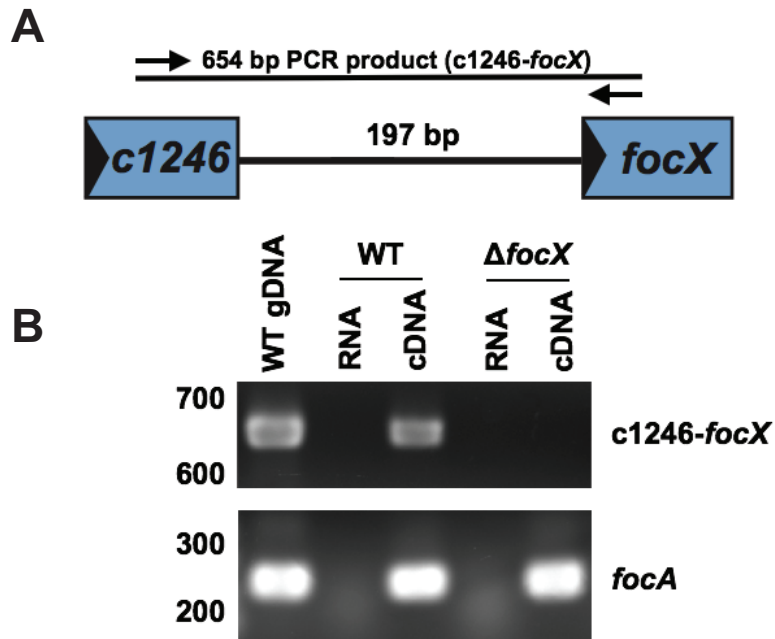

**Fig. S4. *focX* is transcribed as part of the *foc* operon.** (A) Schematic of the *c1246* and *focX* genes in the *foc* operon of CFT073. *focX* is located 197-bp downstream of the *c1246* allele. (B) PCR using Taq polymerase was performed to determine whether *focX* is transcribed with *c1246*. Arrows indicate the location of the primers (*c1246*-F<sub>pcr</sub>/*focX*-R<sub>pcr</sub>) used to PCR amplify a 654-bp product (*c1246-focX*) from either CFT073 or  $\Delta$ *focX* cDNA. Additional primers (*papA*-F<sub>pcr</sub>/*papA*-R<sub>pcr</sub>) were included that amplified a 240-bp product from *focA*, which is included as a positive control confirming cDNA synthesis. CFT073 gDNA acts a positive control, and extracted RNA samples from CFT073 wild type and  $\Delta$ *focX* were DNase treated and act as a negative control for contaminating gDNA.

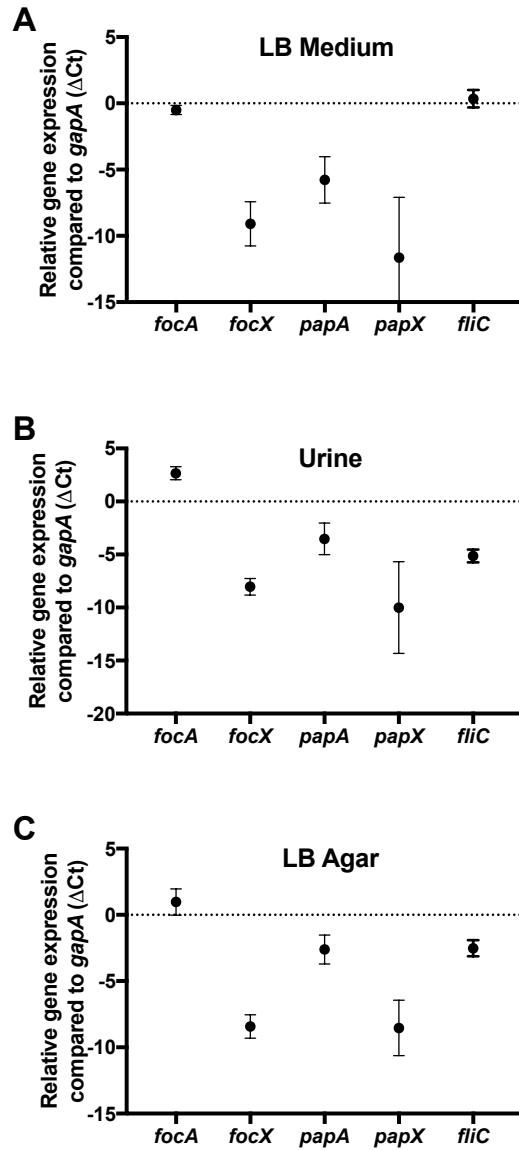

**Fig. S5. Relative expression of *foc*, *pap*, and *fliC* compared to *gapA*.** qPCR was conducted using cDNA collected from *E. coli* CFT073 wild type cultured to mid-logarithmic growth in either (A) LB medium, (B) sterilized and pooled human urine, or (C) from bacteria cultured on LB agar for 24 hr at 37°C. Data represent the average  $\Delta$ Ct values (reference gene *gapA* - gene of interest (GOI)) of *focA*, *focX*, *papA*, *papX*, and *fliC* with error bars showing the standard deviation. The dashed line at  $y=0$  serves as a reference line for no difference between the Ct values of *gapA* and a GOI.

**Table S1. Bacterial strains and plasmids used in this study**

| <b>Strain</b>                               | <b>Genotype/Resistance/Use<sup>a</sup></b>                                                        | <b>Source</b>     |
|---------------------------------------------|---------------------------------------------------------------------------------------------------|-------------------|
| CFT073                                      | Pyelonephritis isolate (O6:K2:H1)                                                                 | (1)               |
| $\Delta$ <i>focX</i>                        | CFT073 $\Delta$ <i>focX::cat</i> (Cam <sup>R</sup> )                                              | This Study        |
| $\Delta$ <i>papX</i>                        | CFT073 $\Delta$ <i>papX::kan</i> (Kan <sup>R</sup> )                                              | (2)               |
| $\Delta$ <i>focX</i> $\Delta$ <i>papX</i>   | CFT073 $\Delta$ <i>focX::cat</i> $\Delta$ <i>papX::kan</i> (Cam <sup>R</sup> , Kan <sup>R</sup> ) | This Study        |
| <i>E. coli</i> F11                          | Cystitis isolate (O6:K2:H31)                                                                      | (3)               |
| <i>E. coli</i> F11<br>$\Delta$ <i>papX</i>  | F11 $\Delta$ <i>papX::kan</i> (Kan <sup>R</sup> )                                                 | This Study        |
| <i>E. coli</i> HM69                         | Cystitis isolate                                                                                  | (4)               |
| <i>E. coli</i> HM69<br>$\Delta$ <i>papX</i> | HM69 $\Delta$ <i>papX::kan</i> (Kan <sup>R</sup> )                                                | This Study        |
|                                             |                                                                                                   |                   |
| <b>Plasmid</b>                              | <b>Relevant Characteristics</b>                                                                   | <b>References</b> |
| pLX3607                                     | IPTG-inducible vector (Amp <sup>R</sup> )                                                         | (5)               |
| pLX- <i>focX</i>                            | <i>pLX3607</i> encoding <i>focX</i> at the multiple cloning site (Amp <sup>R</sup> )              | This Study        |
| pLX- <i>papX</i>                            | <i>pLX3607</i> + <i>papX</i> , also known as pDRM001 (Amp <sup>R</sup> )                          | (5)               |
| pKD4                                        | Vector carrying a FRT-flanked <i>kan</i> gene (Amp <sup>R</sup> , Kan <sup>R</sup> )              | (6)               |
| pKD3                                        | Vector carrying a FRT-flanked <i>cat</i> gene (Amp <sup>R</sup> , Cam <sup>R</sup> )              | (6)               |
| pKD46                                       | Vector carrying phage $\lambda$ Red recombinase (Amp <sup>R</sup> )                               | (6)               |

a: cam-chloramphenicol, kan-kanamycin, amp-ampicillin, R-resistant

**Table S2. Primers used in this study**

| <b>Name</b> | <b>Purpose</b>                                                                                               | <b>Sequence (5'-3')</b>                                       |
|-------------|--------------------------------------------------------------------------------------------------------------|---------------------------------------------------------------|
| scrnF       | Screening by PCR                                                                                             | AGCCCTGTATCTGAGAAAACATGGC                                     |
| scrnR       | Screening by PCR                                                                                             | CACCAGGTCTTTCTGCAACACTACTGC                                   |
| KO-F        | Construction of $\Delta$ <i>focX</i> and $\Delta$ <i>focX</i> $\Delta$ <i>papX</i>                           | ATCTGTCCGCTGTGCCGGGATATCTCAGTT<br>ATACAGTGTAGGCTGGAGCTGCTTC   |
| KO-R        | Construction of $\Delta$ <i>focX</i> and $\Delta$ <i>focX</i> $\Delta$ <i>papX</i>                           | CTTTATGAGCTGACATCATCAAGATGCGCC<br>AGTAAATGGGAATTAGCCATGGTCC   |
| KO-F2       | Construction of $\Delta$ <i>focX</i> $\Delta$ <i>papX</i> in CFT073 and $\Delta$ <i>papX</i> in F11 and HM69 | ATGCGCGCTTGTACACAGACAGTGTGTTTC<br>AGTAAGTGTAGGCTGGAGCTGCTTC   |
| KO-R2       | Construction of $\Delta$ <i>focX</i> $\Delta$ <i>papX</i>                                                    | AATGACTTCAAACAGTTCCTGTTTCATCATG<br>GGTCAATGGGAATTAGCCATGGTCC9 |
| scrnF2      | Screening by PCR                                                                                             | AACGCTGCTCATGATATTGC                                          |
| scrnR2      | Screening by PCR                                                                                             | TCTGCAGGCGCAGCTGGATAAAC                                       |
| scrnR       | Screening by PCR in HM69 and F11 for $\Delta$ <i>papX</i>                                                    | TGAGCTGACATCATCAAGATG                                         |
| pLXfocX-F   | Construction of pLX- <i>focX</i>                                                                             | NNNNCCATGGGGAATAACACAGACACATT                                 |
| pLXfocX-R   | Construction of pLX- <i>focX</i>                                                                             | NNNNAAGCTTTTATGAGCTGACATCATCA<br>AGATG                        |
| scrn-pLX-F  | Screening by PCR of pLX3607                                                                                  | ATTTGCTTTGTGAGCGGATAAC                                        |
| scrn-pLX-R  | Screening by PCR of pLX3607                                                                                  | CTATCAACAGGAGTCCAAGCTC                                        |
| gapA-F      | qPCR                                                                                                         | TGCCTGGCTCCGCTGGCTAA                                          |
| gapA-R      | qPCR                                                                                                         | CGCCGCGCCAGTCTTTGTGA                                          |
| flhD-F      | qPCR                                                                                                         | TCCGCCTATGTTTCGTCTCGGCATA                                     |
| flhD-R      | qPCR                                                                                                         | ACCAGTTGATTGGTTTCTGCCAGC                                      |
| fliA-F      | qPCR                                                                                                         | GCGGTATAGAGTGAATTCAC                                          |
| fliA-R      | qPCR                                                                                                         | GCGTTTACGCCGCATCCGGC                                          |
| fliC-F      | qPCR                                                                                                         | ACAGCCTCTCGCTGATCACTCAA                                       |
| fliC-R      | qPCR                                                                                                         | GCGCTGTTAATACGCAAGCCAGAA                                      |
| gapA-F      | qPCR2                                                                                                        | ACCAACTGCCTGGCTCCGCTGGCTAAAGT                                 |
| gapA-R      | qPCR2                                                                                                        | CGCGCCAGTCTTTGTGAGACGGGCCATCAA                                |
| papA-F      | qPCR2                                                                                                        | TGGTGCGACAGCAACAGGTGTTTCCTATTT                                |
| papA-R      | qPCR2                                                                                                        | TCGCAACTGCTGAGAAAGCACCTTCTGT                                  |
| papX-F      | qPCR2                                                                                                        | TCCATACACTCCGGCATAACAGCG                                      |
| papX-R      | qPCR2                                                                                                        | CCCCGCATATCCCTTTCG                                            |
| focA-F      | qPCR2                                                                                                        | TGACTCGCAGGTGTCTGCTGGTGCAGGAAT                                |
| focX-R      | qPCR2                                                                                                        | CCGACGTTTGTGCGAACCCTGTCAGAA                                   |
| focX-F      | qPCR2                                                                                                        | AGCCCTGTATCTGAGAAAACATGGC                                     |
| focX-R      | qPCR2                                                                                                        | CACCAGGTCTTTCTGCAACACTACTGC                                   |
| fliC-F      | qPCR2                                                                                                        | TGGTGCGACTGCGGCTACGCTTGATGGTTT                                |
| fliC-R      | qPCR2                                                                                                        | AGTTGCAGCACCAGCATCAGCACCCTTTT                                 |
| gsp1        | 5'RACE                                                                                                       | ATACCTTCAGATGTCAG                                             |
| gsp2        | 5'RACE                                                                                                       | ATCCTCCCTGCTATCCATCC                                          |

|             |                          |                            |
|-------------|--------------------------|----------------------------|
| nested_gsp2 | 5'RACE                   | CTGAAGGTGACAGACAATGACTCTCC |
| papA-Fpcr   | PCR of <i>papA</i>       | ACAAATGCGTCTGCTGTCAC       |
| papA-Rpcr   | PCR of <i>papA</i>       | TGGGCCTGAAAAGACAATTC       |
| c1246-Fpcr  | PCR of <i>c1246-focX</i> | CCGGTGATGACCCCCTGTTA       |
| focX-Rpcr   | PCR of <i>c1246-focX</i> | TTTGCGCGAATACAGAGTTG       |

## References

1. Mobley, HL, Green, M, Trifillis, AL, Johnson DE, Chippendale GR, Lockett CV, Jones BD, Warren JW. 1990. Pyelonephritogenic *Escherichia coli* and killing of cultured human renal proximal tubular epithelial cells: role of hemolysin in some strains. *Infect. Immun.* 58:1281-1289.
2. Simms AN, Mobley HL. 2008. PapX, a P fimbrial operon-encoded inhibitor of motility in uropathogenic *Escherichia coli*. *Infect Immun* 76:4833-41.
3. Stapleton A, Moseley S, Stamm WE. 1991. Urovirulence determinants in *Escherichia coli* isolates causing first-episode and recurrent cystitis in women. *J Infect Dis* 163:773-9.
4. Subashchandrabose S, Hazen TH, Rasko DA, Mobley HL. 2013. Draft genome sequences of five recent human uropathogenic *Escherichia coli* isolates. *Pathog Dis* 69:66-70.
5. Li X, Rasko DA, Lockett CV, Johnson DE, Mobley HL. 2001. Repression of bacterial motility by a novel fimbrial gene product. *EMBO J* 20:4854-62.
6. Datsenko KA, Wanner BL. 2000. One-step inactivation of chromosomal genes in *Escherichia coli* K-12 using PCR products. *Proc. Natl. Acad. Sci. U.S.A.* 97:6640-6645.
